# Supplementary material for: Conditional Survival Analysis of Patients With Locally Advanced Laryngeal Cancer: Construction of a Dynamic Risk Model and Clinical Nomogram
Source: PubMed Central journal article supplement (PMC5343446; doi:10.1038/srep43928), 2017-03-09

## **Conditional Survival Analysis of Patients With Locally Advanced Laryngeal Cancer: Construction of a Dynamic Risk Model and Clinical Nomogram.**

*Multidisciplinary Larynx Cancer Working Group*

Contributing authors:

Tommy Sheu MD, MPH<sup>1</sup>, David Vock, PhD<sup>5</sup>, Abdallah S. R. Mohamed, MD, MSc<sup>1,6\*</sup>, Neil Gross, MD<sup>2</sup>, Collin Mulcahy, BS<sup>1</sup>, Mark Zafereo, MD<sup>2</sup>, G. Brandon Gunn MD<sup>1</sup>, Adam S. Garden MD<sup>1</sup>, Parag Sevak<sup>7</sup>, MD, Jack Phan MD, PhD<sup>1</sup>, Jan S. Lewin, PhD<sup>2</sup>, Steven J. Frank MD<sup>1</sup>, Beth M. Beadle MD, PhD<sup>1</sup>, William H. Morrison MD<sup>1</sup>, Stephen Y. Lai, MD, PhD<sup>2</sup>, Kate Hutcheson, PhD<sup>2</sup>, G. Elisabeta Marai, PhD<sup>8</sup>, Guadalupe M. Canahuate, PhD<sup>9</sup>, Merrill Kies, MD<sup>3</sup>, Adel El-Naggar, MD<sup>4</sup>, Randal S. Weber, MD<sup>2</sup>, David I. Rosenthal MD<sup>1</sup>, Clifton D. Fuller MD, PhD<sup>1\*</sup>.

<sup>1</sup>Departments of Radiation Oncology, <sup>2</sup>Head and Neck Surgery, <sup>3</sup>Medical Oncology, and <sup>4</sup>Pathology, The University of Texas MD Anderson Cancer Center, Houston, Texas, USA.

<sup>5</sup>Department of Biostatistics, University of Minnesota School of Public Health, Minneapolis, Minnesota, USA.

<sup>6</sup>Department of Clinical Oncology and Nuclear Medicine, University of Alexandria, Alexandria, Egypt.

<sup>7</sup>Department of Radiation Oncology, Henry Ford Hospital, Detroit, MI, USA.

<sup>8</sup>Department of Computer Science, University of Illinois at Chicago, Chicago, Illinois, USA.

<sup>9</sup>Department of Electrical & Computer Engineering, University of Iowa, Iowa City, IA, USA.

**Supplemental Figure**

Supplemental Figure S1

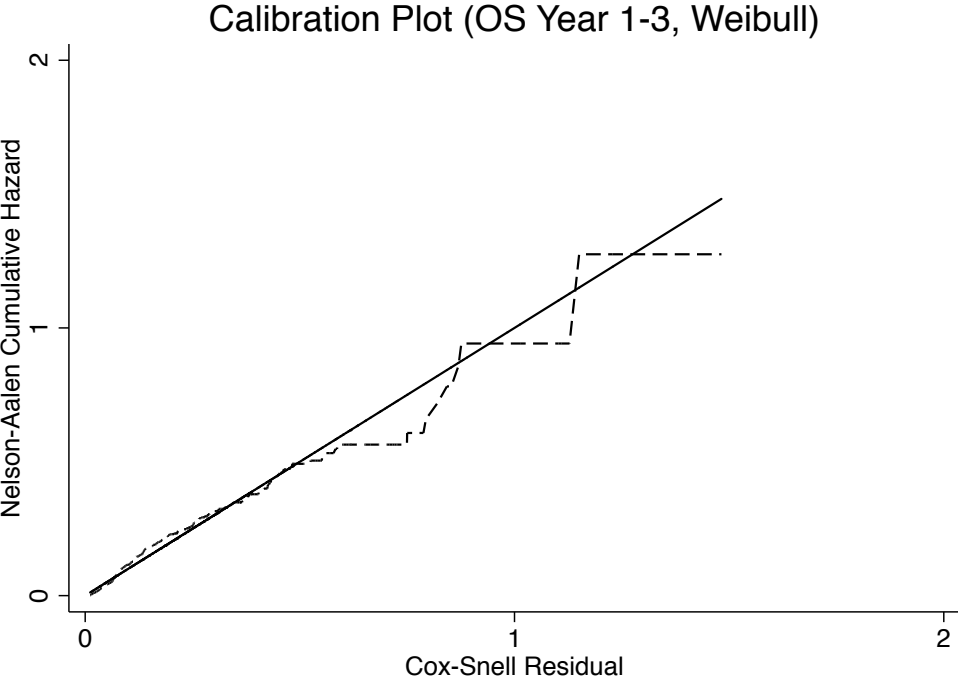

Supplemental Figure S2

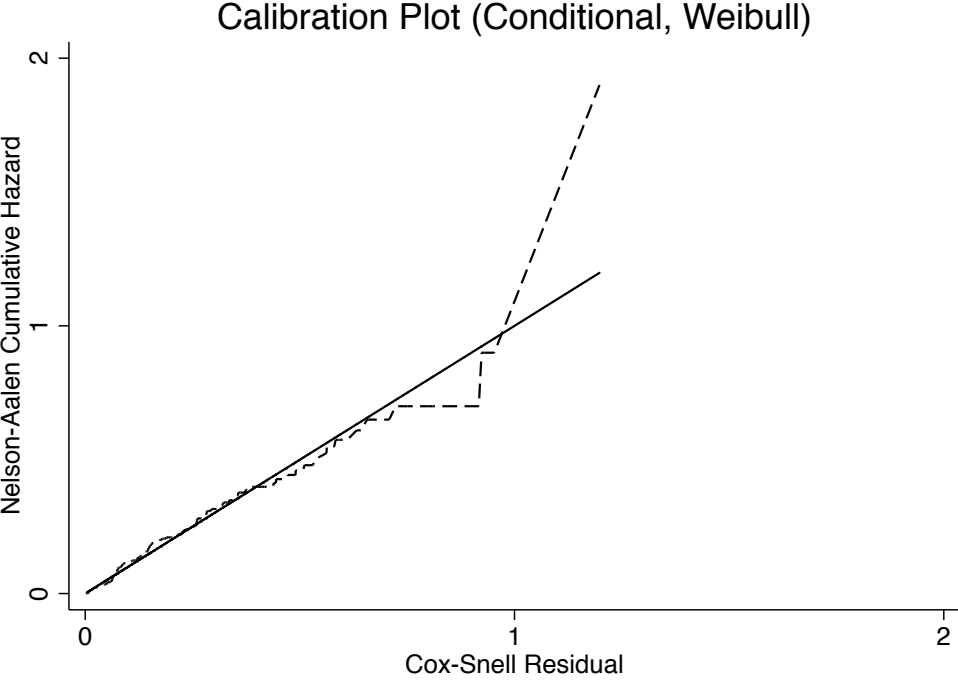

Supplemental Figure S3

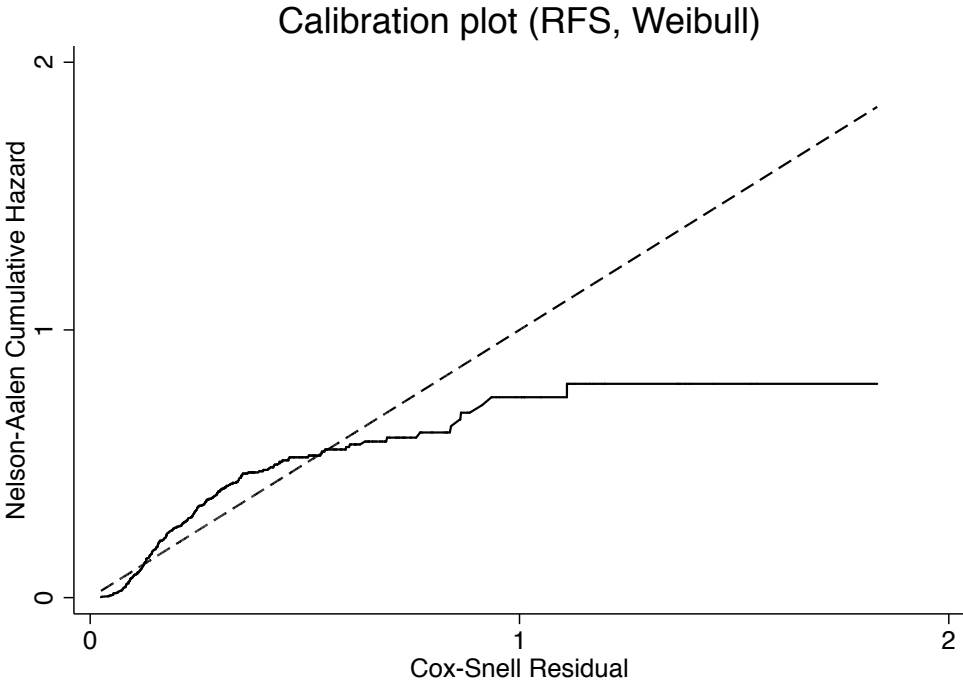

Supplemental Figure S4

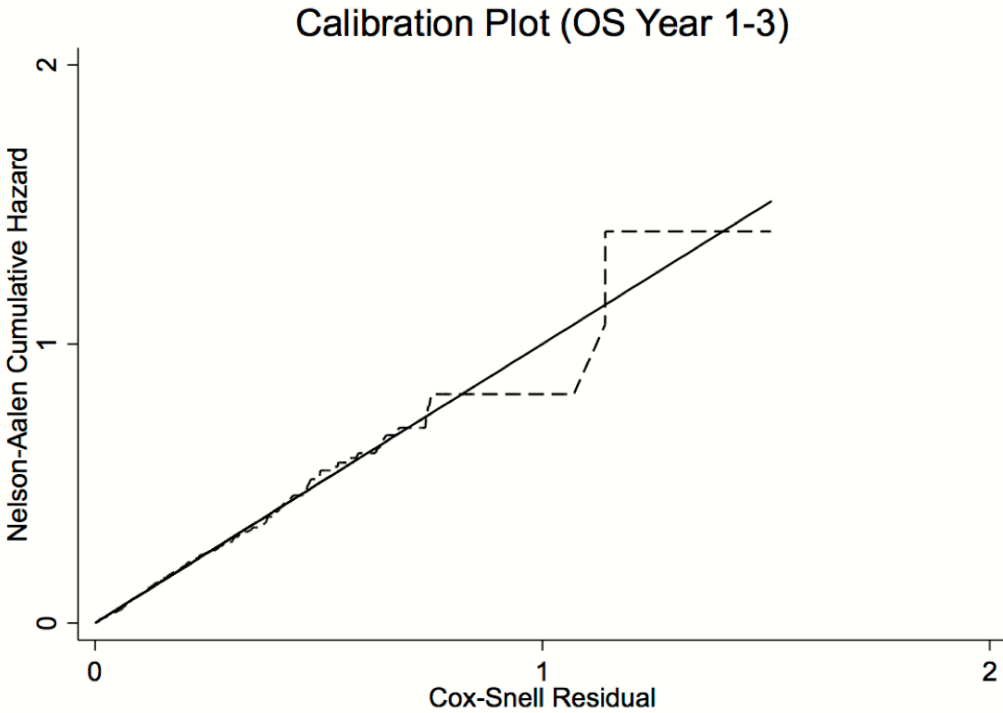

Supplemental Figure S5

### Calibration Plot (Conditional Fit)

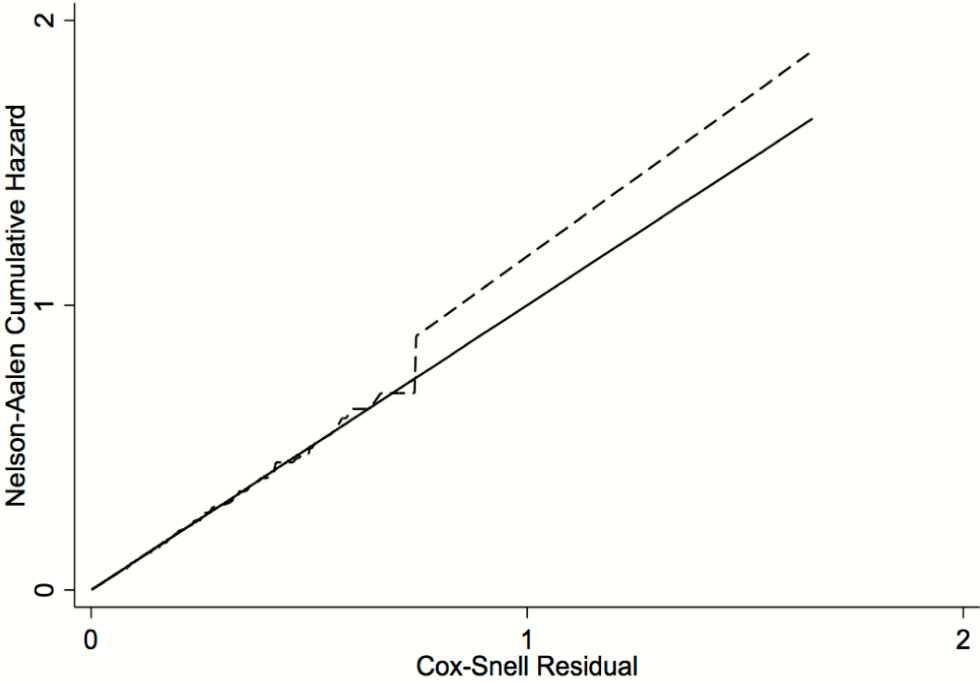

Supplement: srep43928-s1.pdf [file srep43928-s1.pdf]
